# Supplementary material for: Global Landscape of Native Protein Complexes in Synechocystis sp. PCC 6803
Source: PubMed Central journal article supplement (PMC9880817; doi:10.1016/j.gpb.2020.06.020), 2021-02-24

# SEC

Fractions

1 45

# PolyCATWAX

Fractions

1 43

Identified protein

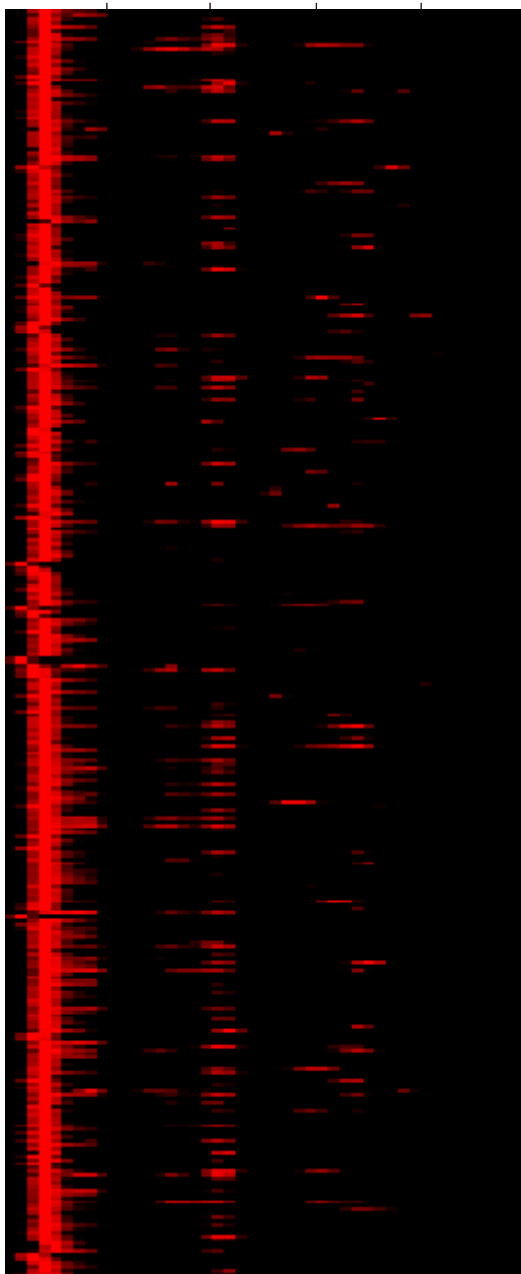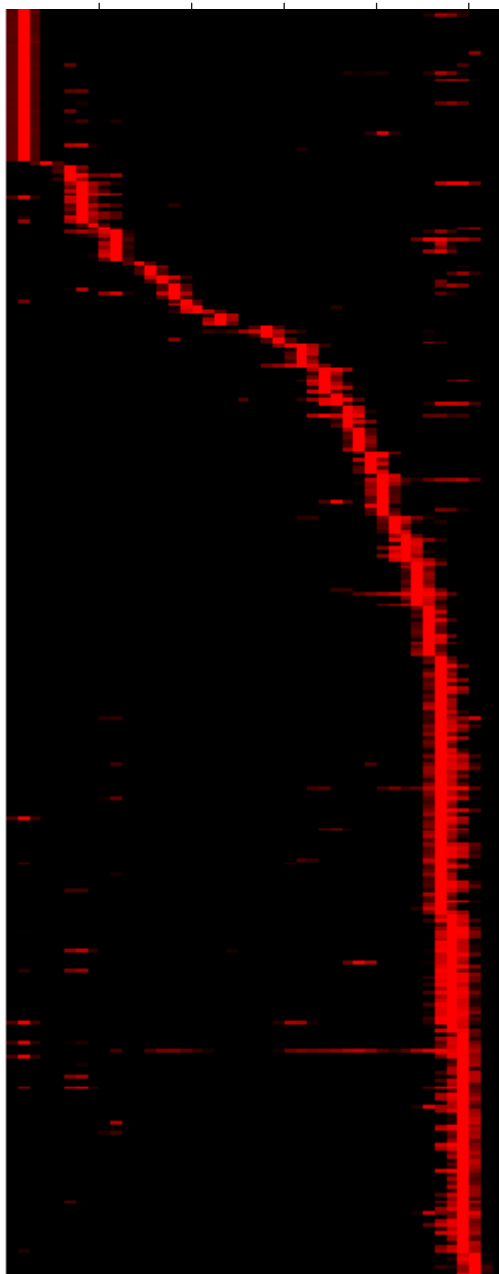

Normalized Intensity

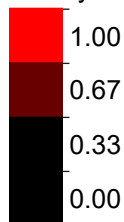

Supplement: mmc1.pdf [file mmc1.pdf]
