# Supplementary material for: Global Landscape of Native Protein Complexes in Synechocystis sp. PCC 6803
Source: PubMed Central journal article supplement (PMC9880817; doi:10.1016/j.gpb.2020.06.020), 2021-02-24

### A The distribution of average MW in SEC1

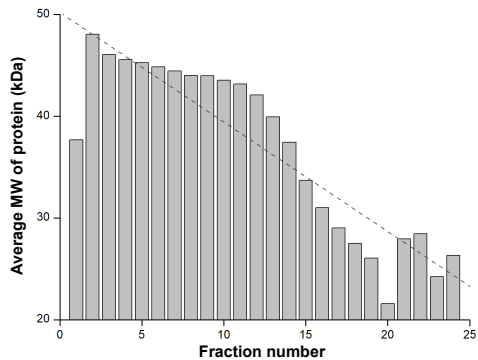

### B The distribution of average MW in SEC2

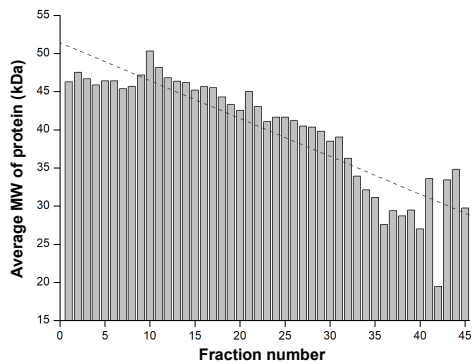

### C The distribution of average pI in IEX

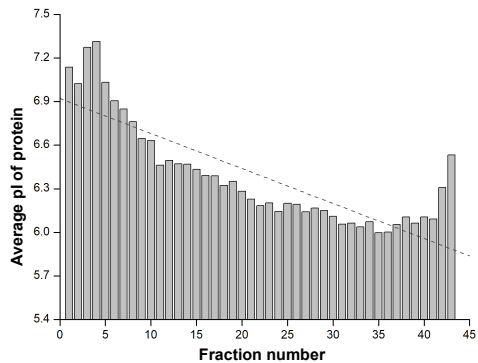

Supplement: mmc2.pdf [file mmc2.pdf]
