# Supplementary material for: Global Landscape of Native Protein Complexes in Synechocystis sp. PCC 6803
Source: PubMed Central journal article supplement (PMC9880817; doi:10.1016/j.gpb.2020.06.020), 2021-02-24

A Regression curve of standard proteins in SEC1

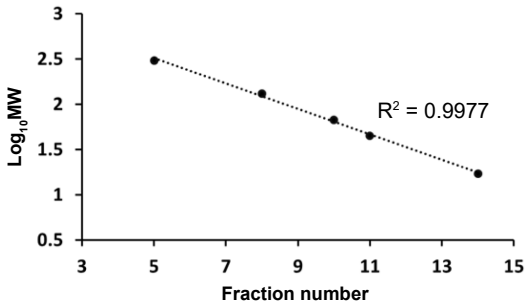

B Regression curve of standard proteins in SEC2

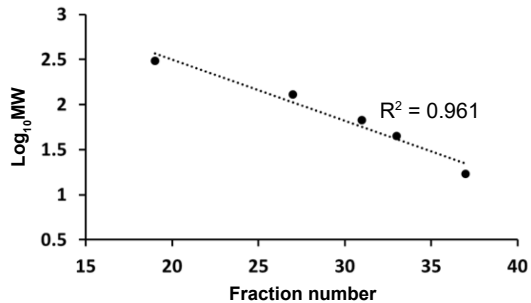

Supplement: mmc3.pdf [file mmc3.pdf]
