# Supplementary material for: Global Landscape of Native Protein Complexes in Synechocystis sp. PCC 6803
Source: PubMed Central journal article supplement (PMC9880817; doi:10.1016/j.gpb.2020.06.020), 2021-02-24

### CRISPR 1

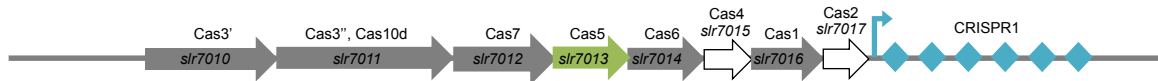

### CRISPR 2

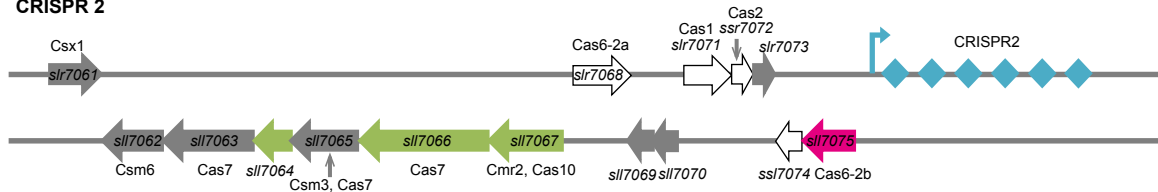

### CRISPR 3

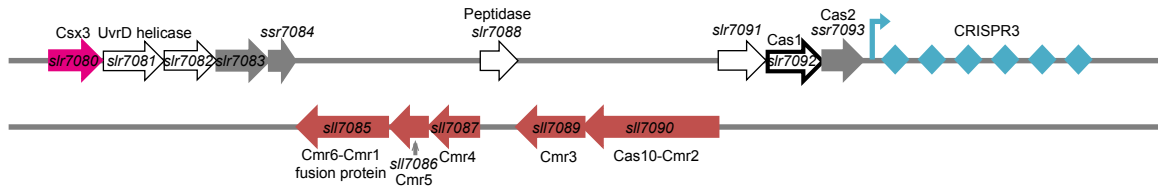

Supplement: mmc7.pdf [file mmc7.pdf]
