# Supplementary material for: Global Landscape of Native Protein Complexes in Synechocystis sp. PCC 6803
Source: PubMed Central journal article supplement (PMC9880817; doi:10.1016/j.gpb.2020.06.020), 2021-02-24
Supplement: mmc8.pdf [file mmc8.pdf]

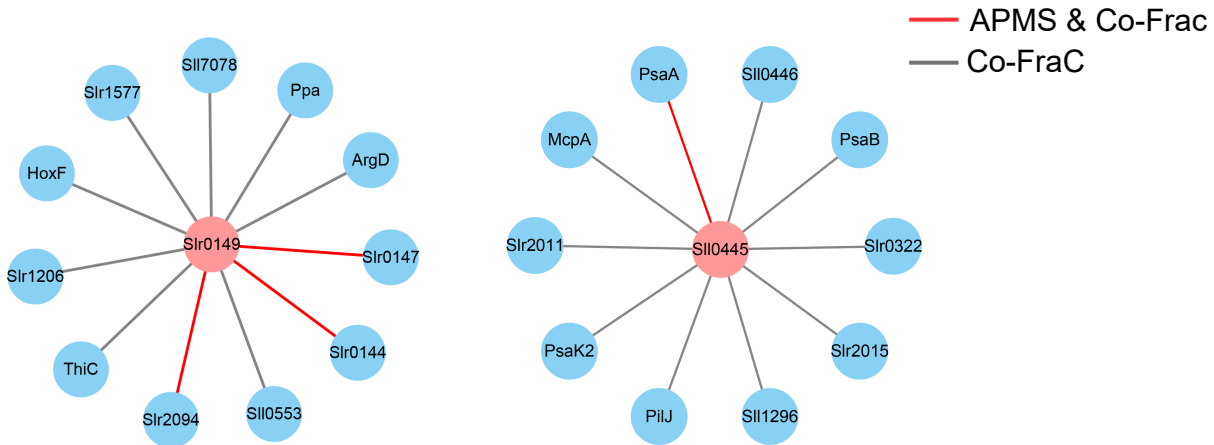

|             | <b>Protein</b>     | <b>PSM count</b> |
|-------------|--------------------|------------------|
| <b>Bait</b> | <b>Slr0149-GFP</b> | <b>12</b>        |
| Prey        | Slr0144            | 6                |
|             | Slr0147            | 6                |
|             | Slr2094            | 3                |
| <b>Bait</b> | <b>SII0445-GFP</b> | <b>14</b>        |
| Prey        | PsaA               | 5                |
|             | PsaF               | 8                |
|             | Slr2018            | 8                |
