# Supplementary material for: Global Landscape of Native Protein Complexes in Synechocystis sp. PCC 6803
Source: PubMed Central journal article supplement (PMC9880817; doi:10.1016/j.gpb.2020.06.020), 2021-02-24

## A Homologous with *A. thaliana* part

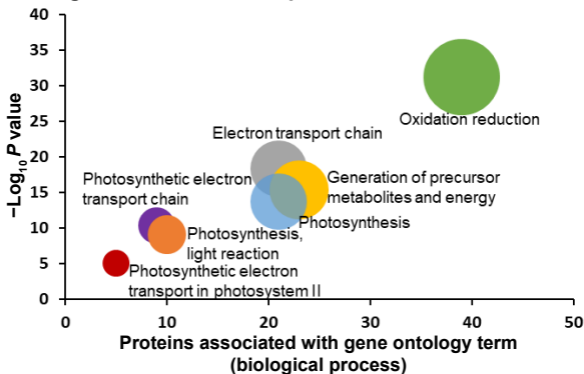

## B Homologous with *A. thaliana* and *E. coli* part

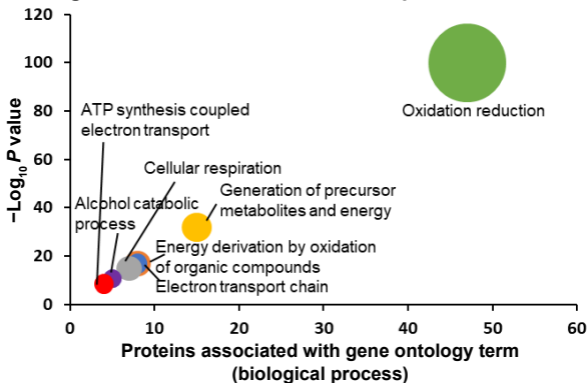

Supplement: mmc10.pdf [file mmc10.pdf]
