# Supplementary material for: Global Landscape of Native Protein Complexes in Synechocystis sp. PCC 6803
Source: PubMed Central journal article supplement (PMC9880817; doi:10.1016/j.gpb.2020.06.020), 2021-02-24

**A**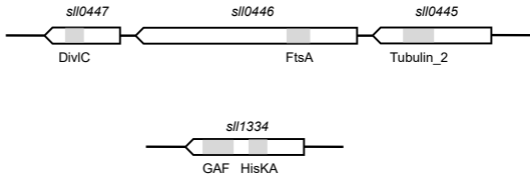**B**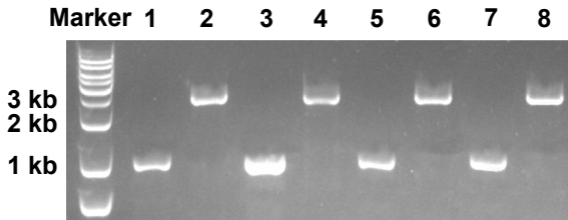

Supplement: mmc11.pdf [file mmc11.pdf]
